# Supplementary material for: Skeletal Response to Insulin in the Naturally Occurring Type 1 Diabetes Mellitus Mouse Model
Source: PubMed Central journal article supplement (PMC8101621; doi:10.1002/jbm4.10483), 2021-03-17

## Skeletal response to insulin in the naturally occurring type 1 diabetes mellitus mouse model

Manisha Dixit<sup>1</sup>, Zhongbo Liu<sup>1</sup>, Sher-Bahadur Poudel<sup>1</sup>, Gozde Yildirim<sup>1</sup>, Yanjiao Zhang Zhang<sup>1</sup>, Shilpa Mehta<sup>1</sup>, Omer Murik<sup>2</sup>, Geona Altarescu<sup>2</sup>, Yoshifumi Kobayashi<sup>3</sup>, Emi Shimizu<sup>3</sup>, Mitchell B Schaffler<sup>4</sup>, Shoshana Yakar<sup>1</sup>

<sup>1</sup>David B. Kriser Dental Center, Department of Molecular Pathobiology New York University College of Dentistry New York, NY 10010-4086

<sup>2</sup>Medical Genetics Institute, Shaare Zedek Medical Center, Jerusalem, Israel.

<sup>3</sup>Oral Biology Department, Rutgers School of Dental Medicine, 110 Bergen Street, Newark, NJ, USA.

<sup>4</sup>Department of Biomedical Engineering, City College of New York, 160 Convent Avenue, New York, NY, 10031, USA

### Supplements;

#### Supplemental table 1: Antibodies

| Antibody                         | Company                 | Catalog no | Dilution used |
|----------------------------------|-------------------------|------------|---------------|
| Cathepsin K antibody             | Abcam                   | ab19027    | 1:200         |
| pAKT(phospho Ser473) antibody    | Genetex                 | 89304-112  | 1:50          |
| Glut1 antibody                   | Thermofisher scientific | PA1-46152  | 1:200         |
| Glut4 antibody                   | Biogenesis              | 4670-1704  | 1:500         |
| PDK4 antibody                    | Thermofisher scientific | 12949-1-AP | 1:50          |
| Sclerostin antibody              | R & D systems           | AF1589     | 1:12          |
| FGF23 antibody                   | R & D systems           | MAB26291   | 1:100         |
| Donkey Anti-Goat IgG H&L (HRP)   | Abcam                   | ab97110    | 1:200         |
| VECTASTAIN® ABC Kit (Rabbit IgG) | Vector labs             | PK-4001    | NA            |

#### Supplemental table 2: qPCR primer sequences

| Gene              | Forward primer        | Reverse primer          |
|-------------------|-----------------------|-------------------------|
| Osteocyte markers |                       |                         |
| <b>Phex</b>       | GAAAGGGGACCAACCGAGG   | AACTTAGGAGACCTTGACTCACT |
| <b>SOST</b>       | AGCCTTCAGGAATGATGCCAC | CTTTGGCGTCATAGGGATGGT   |
| <b>DMP-1</b>      | TTCGCTGAGGTTTTGACCTT  | TTGGGATGCGATTCTCTAC     |
| <b>FGF-23</b>     | ATGCTAGGGACCTGCCTTAGA | AGCCAAGCAATGGGGAAGTG    |
| <b>Pdnp</b>       | ACCGTGCCAGTGTGTTCTG   | AGCACCTGTGGTTGTTATTTGT  |
| <b>MEPE</b>       | GTCTGTTGGACTGCTCCTCTT | CACCGTGGGATCAGGATACA    |
| <b>RANKL</b>      | CAGCATCGCTCTGTTCTGTGA | CTGCGTTTTTCATGGAGTCTCA  |
| <b>OPG</b>        | ACCCAGAAACTGGTCATCAGC | CTGCAATACACACTCATCACT   |

**Supplement Table 3:** mCT analysis of the osseous system of NOR, non-diabetic (ND), diabetic (D) and insulin treated (In) NOD mice. Data presented as mean $\pm$ -SD, one-way ANOVA with  $p < 0.05$  was considered significant. Comparisons that were insignificant are labeled NS.

|                                                                                   | NOR                | Non-diabetic NOD (ND) | Diabetic NOD (D)   | Insulin treated NOD (In) | Significance                                             |
|-----------------------------------------------------------------------------------|--------------------|-----------------------|--------------------|--------------------------|----------------------------------------------------------|
| Sample size                                                                       | 10                 | 26                    | 19                 | 14                       | Presented $p < 0.05$                                     |
| <b>Femur mid-diaphysis, cortical bone parameters:</b>                             |                    |                       |                    |                          |                                                          |
| BV/TV, %                                                                          | 50.039 $\pm$ 0.544 | 57.268 $\pm$ 0.409    | 53.064 $\pm$ 0.921 | 56.237 $\pm$ 0.907       | NOR vs ND<br>NOR vs D<br>NOR vs In<br>ND vs D            |
| T.Ar, mm <sup>2</sup>                                                             | 1.431 $\pm$ 0.029  | 1.416 $\pm$ 0.016     | 1.346 $\pm$ 0.014  | 1.372 $\pm$ 0.027        | NOR vs D<br>ND vs D                                      |
| B.Ar, mm <sup>2</sup>                                                             | 0.716 $\pm$ 0.018  | 0.811 $\pm$ 0.010     | 0.715 $\pm$ 0.016  | 0.771 $\pm$ 0.016        | NOR vs ND<br>ND vs D                                     |
| M.Ar, mm <sup>2</sup>                                                             | 0.714 $\pm$ 0.014  | 0.605 $\pm$ 0.009     | 0.631 $\pm$ 0.013  | 0.601 $\pm$ 0.019        | NOR vs ND<br>NOR vs D<br>NOR vs In                       |
| Cs.Th, mm                                                                         | 0.183 $\pm$ 0.003  | 0.212 $\pm$ 0.002     | 0.189 $\pm$ 0.004  | 0.205 $\pm$ 0.004        | NOR vs ND<br>NOR vs In<br>ND vs D<br>D vs In             |
| J <sub>0</sub> , 1/mm <sup>4</sup>                                                | 0.251 $\pm$ 0.011  | 0.273 $\pm$ 0.006     | 0.234 $\pm$ 0.006  | 0.252 $\pm$ 0.009        | NOR vs ND<br>ND vs D                                     |
| Length (Le), mm                                                                   | 15.648 $\pm$ 0.127 | 15.815 $\pm$ 0.127    | 15.316 $\pm$ 0.128 | 15.857 $\pm$ 0.065       | NS                                                       |
| Robustness (Le/T.Ar)                                                              | 0.091 $\pm$ 0.002  | 0.090 $\pm$ 0.001     | 0.088 $\pm$ 0.001  | 0.087 $\pm$ 0.002        | NS                                                       |
| BMD, g/cc                                                                         | 1.337 $\pm$ 0.004  | 1.338 $\pm$ 0.005     | 1.348 $\pm$ 0.007  | 1.328 $\pm$ 0.006        | NS                                                       |
| <b>Femur distal metaphysis, trabecular bone parameters:</b>                       |                    |                       |                    |                          |                                                          |
| BV/TV, %                                                                          | 6.387 $\pm$ 0.402  | 6.812 $\pm$ 0.719     | 5.818 $\pm$ 0.514  | 5.194 $\pm$ 0.883        | NS                                                       |
| Tb.Th, mm                                                                         | 0.057 $\pm$ 0.001  | 0.064 $\pm$ 0.001     | 0.053 $\pm$ 0.002  | 0.060 $\pm$ 0.002        | NOR vs ND<br>ND vs D<br>D vs In                          |
| Tb.Sp, mm                                                                         | 0.452 $\pm$ 0.016  | 0.589 $\pm$ 0.030     | 0.549 $\pm$ 0.024  | 0.634 $\pm$ 0.031        | NOR vs ND<br>NOR vs In                                   |
| Tb.N, 1/mm                                                                        | 1.122 $\pm$ 0.061  | 1.053 $\pm$ 0.104     | 1.097 $\pm$ 0.094  | 0.843 $\pm$ 0.123        | NS                                                       |
| BMD, g/cc                                                                         | 0.123 $\pm$ 0.005  | 0.112 $\pm$ 0.009     | 0.112 $\pm$ 0.007  | 0.097 $\pm$ 0.013        | NS                                                       |
| <b>Lumbar Skeleton (L5):</b>                                                      |                    |                       |                    |                          |                                                          |
| Sample size                                                                       | 7                  | 6                     | 6                  | 6                        |                                                          |
| BV/TV, %                                                                          | 20.216 $\pm$ 1.030 | 23.578 $\pm$ 1.002    | 16.447 $\pm$ 1.013 | 15.908 $\pm$ 2.014       | ND vs D<br>ND vs In                                      |
| Tb.Th, mm                                                                         | 0.059 $\pm$ 0.001  | 0.074 $\pm$ 0.002     | 0.057 $\pm$ 0.002  | 0.061 $\pm$ 0.002        | NOR vs ND<br>ND vs D<br>ND vs In                         |
| Tb.Sp, mm                                                                         | 0.259 $\pm$ 0.009  | 0.275 $\pm$ 0.009     | 0.276 $\pm$ 0.007  | 0.315 $\pm$ 0.017        | NOR vs In                                                |
| Tb.N, 1/mm                                                                        | 3.390 $\pm$ 0.140  | 3.182 $\pm$ 0.076     | 2.881 $\pm$ 0.071  | 2.569 $\pm$ 0.207        | NS                                                       |
| BMD, g/cc                                                                         | 0.449 $\pm$ 0.017  | 0.533 $\pm$ 0.019     | 0.375 $\pm$ 0.018  | 0.386 $\pm$ 0.032        | ND vs D<br>ND vs In                                      |
| <b>Alveolar Bone (mandible, between 1<sup>st</sup> and 2<sup>nd</sup> Molars)</b> |                    |                       |                    |                          |                                                          |
| Sample size                                                                       | 10                 | 26                    | 21                 | 10                       |                                                          |
| BV/TV, %                                                                          | 52.397 $\pm$ 2.387 | 55.115 $\pm$ 3.067    | 39.636 $\pm$ 5.035 | 62.433 $\pm$ 3.101       | NOR vs ND<br>NOR vs D<br>NOR vs In<br>ND vs D<br>D vs In |
| Tb.Th, mm                                                                         | 0.095 $\pm$ 0.004  | 0.110 $\pm$ 0.005     | 0.086 $\pm$ 0.008  | 0.119 $\pm$ 0.004        | NOR vs ND<br>NOR vs In                                   |
| Tb.Sp, mm                                                                         | 0.085 $\pm$ 0.005  | 0.128 $\pm$ 0.006     | 0.145 $\pm$ 0.005  | 0.105 $\pm$ 0.011        | NS                                                       |
| Tb.N, 1/mm                                                                        | 5.493 $\pm$ 0.149  | 4.991 $\pm$ 0.235     | 4.482 $\pm$ 0.235  | 5.237 $\pm$ 0.108        | NOR vs D                                                 |
| BMD, g/cc                                                                         | 1.260 $\pm$ 0.013  | 1.419 $\pm$ 0.027     | 1.294 $\pm$ 0.043  | 1.299 $\pm$ 0.022        | NOR vs ND<br>ND vs D<br>ND vs In                         |

**Supplement Figure 1: Gene expression of osteogenic markers at the femur diaphysis, and alveolar bone of the mandible.** (A) Expression of osteocyte markers at femur diaphysis. (B) Expression of mature osteoblast and osteocyte markers in alveolar bone. (C) Expression of osteoclast markers in alveolar bone.

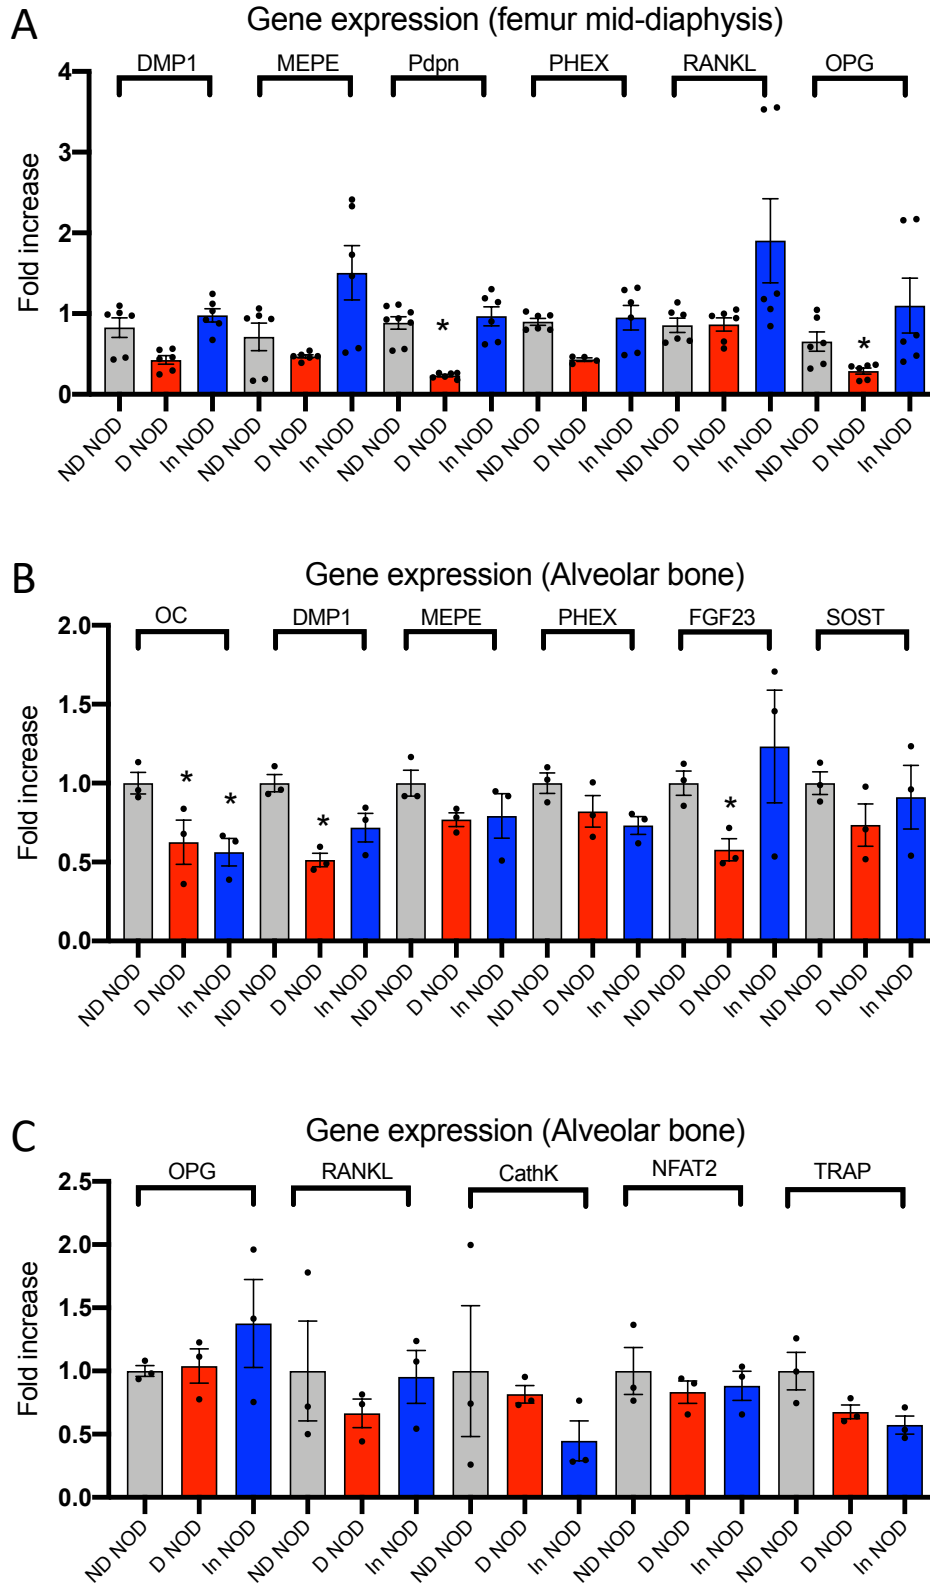

**Supplement Figure 2: Diabetic NOD mice show alterations in the expression of GLUT1, PDK4, and p-AKT and GLUT4. GLUT1 (A), PDK4 (B), (C) pAKT, and (D) GLUT4 positive osteocytes in cancellous bone of the L5 vertebra. Representative sections from ND-NOD, D-NOD and In-NOD groups, quantifications are provided in Figure 7.**

**supplement 2**

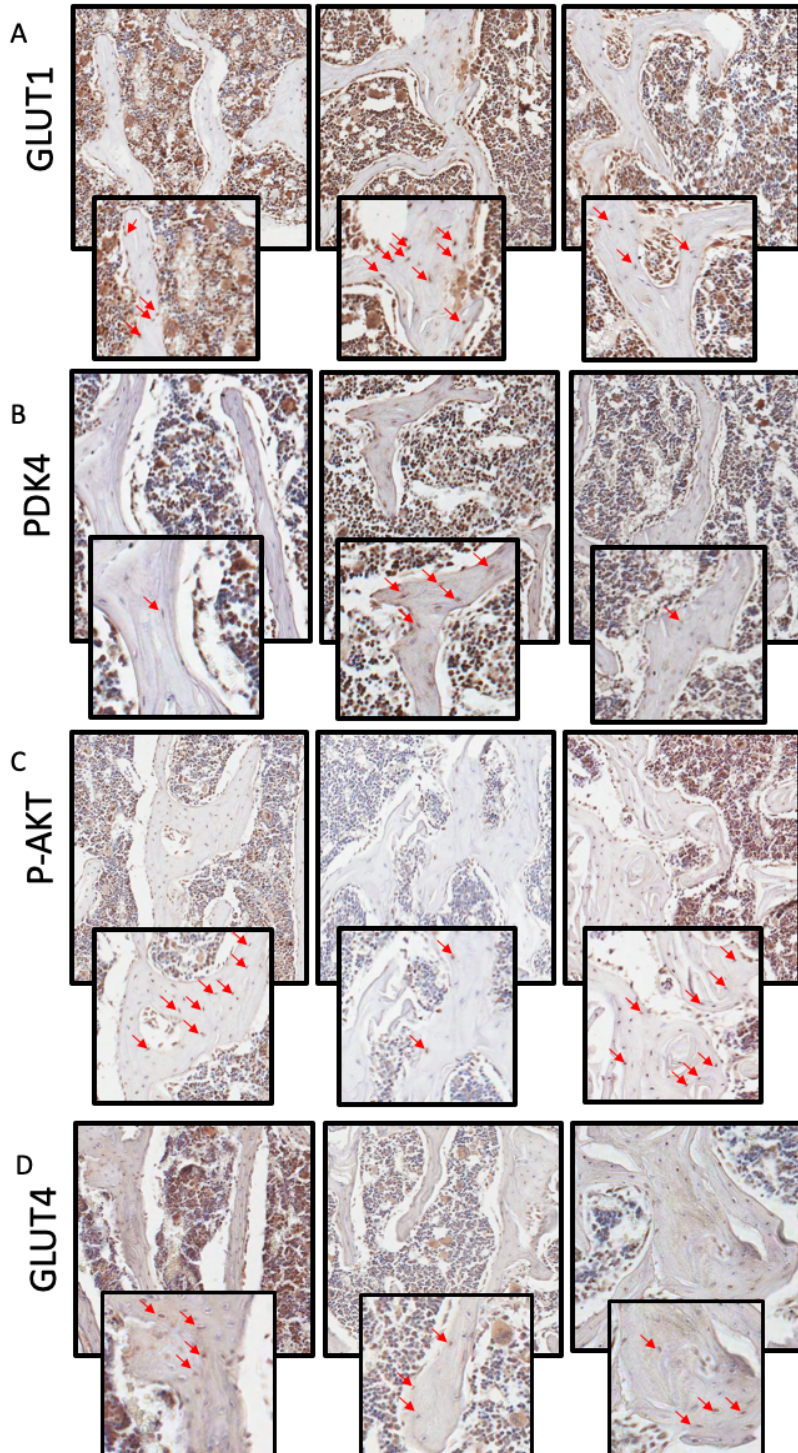

Supplement: JBM4-5-e10483-s001.pdf [file JBM4-5-e10483-s001.pdf]
